# Supplementary material
Source: PubMed Central journal article supplement (PMC4012884)
Supplement: cmi201118x1.pdf [file cmi201118x1.pdf]

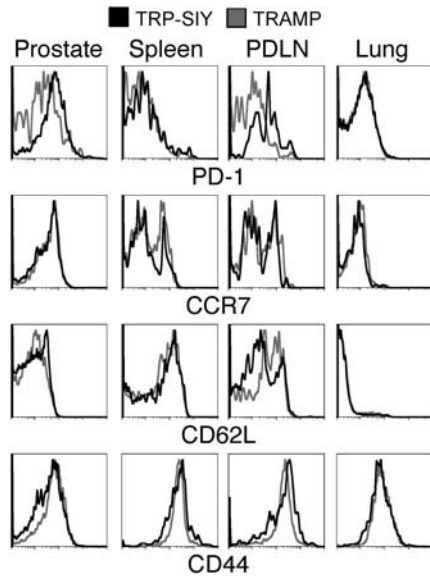

**Supplemental Figure 1** Phenotype of 2C T cells in TRAMP and TRP-SIY mice. TRAMP and TRP-SIY mice were transferred with Thy1.1<sup>+</sup> 2C cells and infected with WSN-SIY virus. Different dpi, cells from prostate, spleen, PDLN and lung were analyzed for CD8, Thy1.1, plus PD-1, CCR7, CD62L or CD44 expression. Plots show comparison of staining profiles of PD-1 (45 dpi), CCR7 and CD62L (60 dpi), as well as CD44 (150 dpi) of Thy1.1<sup>+</sup>CD8<sup>+</sup> 2C cells between TRAMP and TRP-SIY mice. PDLN cells from 2–3 mice were pooled for the CCR7 and CD62L analysis. dpi, days post-infection; PD-1, Programmed death-1 receptor; PDLN, prostate draining lymph nodes; SIY, SIYRYYGGL; TRAMP, TRAnsgenic Adenocarcinoma of the Mouse Prostate; TRP-SIY, TRAMP mice expressing SIY antigen in prostate tumor tissue; WSN-SIY, influenza A/WSN virus expressing the SIY epitope.
